# Supplementary material
Source: PubMed Central journal article supplement (PMC9847504)
Supplement: NEJMc2213907_appendix.pdf [file NEJMc2213907_appendix.pdf]

## Supplementary Appendix

Supplement to: Wang Q, Bowen A, Valdez R, et al. Antibody response to omicron BA.4–BA.5 bivalent booster. N Engl J Med. DOI: 10.1056/NEJMc2213907

This appendix has been provided by the authors to give readers additional information about the work.

**Supplementary Appendix**

1  
2  
3 **Contents**  
4  
5 Supplementary Methods ..... 2  
6 Acknowledgements ..... 3  
7 Author Contributions ..... 4  
8 Declaration of Interests ..... 4  
9 Table S1. Summary of clinical cohorts ..... 5  
10 Table S2. Demographics of clinical cohorts ..... 6  
11 Supplementary References ..... 8  
12  
13

14 **Supplementary Methods**

15

16 *Clinical cohorts*

17

18 Sera analyzed in this study was categorized into several cohorts. Boosted samples consisted of  
19 sera from individuals who had received three doses of monovalent, referred to as wild-type  
20 (WT), mRNA vaccines (either Moderna mRNA-1273 or Pfizer BNT162b2). Sera was also  
21 collected from individuals after a fourth monovalent mRNA vaccine (referred to as “4 shots  
22 WT”). Bivalent vaccine sera were collected from individuals who had received three monovalent  
23 mRNA vaccine doses followed by one dose of the Pfizer or Moderna bivalent vaccine targeting  
24 BA.4/BA.5 in addition to the ancestral strain. BA.4/BA.5 breakthrough sera was collected from  
25 individuals who had received monovalent mRNA vaccines followed by infection with Omicron  
26 sub-lineages BA.4 or BA.5. Samples were examined by anti-nucleoprotein (NP) ELISA to  
27 confirm status of prior SARS-CoV-2 infection.

28

29 A subset of sera analyzed in this study was collected at the University of Michigan through the  
30 Immunity-Associated with SARS-CoV-2 Study (IASO), an ongoing cohort study in Ann Arbor,  
31 Michigan that began in 2020<sup>1</sup>. All IASO participants provided written informed consent and  
32 serum samples were collected under the protocol approved by the Institutional Review Board of  
33 the University of Michigan Medical School.

34

35 A subset of vaccinee and breakthrough sera analyzed in this study was collected at Columbia  
36 University Irving Medical Center. All subjects provided written informed consent, and all serum  
37 collections were performed under protocols reviewed and approved by the Institutional Review  
38 Board of Columbia University.

39

40 Clinical information for the different study cohorts is summarized in **Table S1** with detailed  
41 information on each case provided in **Table S2**.

42

43 *Cell lines*

44

45 Vero-E6 cells (CRL-1586) and HEK293T cells (CRL-3216) were obtained from the American  
46 Type Culture Collection. Cells were maintained in Dulbecco’s Modified Eagle Medium  
47 (DMEM) with 10% fetal bovine serum and 1% penicillin-streptomycin in an atmosphere of 5%  
48 CO<sub>2</sub> at 37 °C.

49

50 *SARS-CoV-2 spike plasmids*

51

52 Plasmids encoding the spike (S) protein of SARS-CoV-2 variants D614G, BA.1, BA.2,  
53 BA.4/BA.5, BA.4.6, BA.2.75, SARS-CoV, GD-Pangolin, GX-Pangolin, and WIV1 were

54 previously constructed<sup>2-7</sup>. BA.2.75.2 spike were constructed with the QuikChange II XL site-  
55 directed mutagenesis kit according to the manufacturer's instructions (Agilent). The sequence of  
56 each construct was confirmed by Sanger sequencing prior to experimental use.

57

### 58 *Pseudovirus production*

59

60 Pseudotyped SARS-CoV-2 variants and other tested sarbecoviruses were generated in the  
61 background of vesicular stomatitis virus (VSV). The native VSV glycoprotein (G) was replaced  
62 with the S protein from each SARS-CoV-2 variant or other tested sarbecoviruses as previously  
63 described<sup>8</sup>. Briefly, HEK293T cells were transfected with plasmids encoding the appropriate S  
64 protein using 1 mg/mL of PEI. Transfected HEK293T cells were then cultured at 37 °C with 5%  
65 CO<sub>2</sub> for 24 hours. Cells were then infected with VSV-G pseudotyped ΔG-luciferase (G\*ΔG-  
66 luciferase, Kerafast). After a two-hour incubation at 37 °C, infected HEK293T cells were washed  
67 three times before being cultured in fresh medium for another 24 hours under the same  
68 conditions. Supernatants were subsequently collected, centrifuged to remove precipitates, and  
69 aliquoted for storage at -80 °C. Prior to infection of target cells, the viral stock was incubated  
70 with 20% I1 hybridoma (anti-VSV-G) supernatant (ATCC; CRL-2700) for 1 h at 37°C to  
71 neutralize contaminating VSV-G pseudotyped ΔG-luciferase.

72

### 73 *Pseudovirus neutralization*

74

75 Before each neutralization assay, all pseudoviruses were titrated to equilibrate the viral input.  
76 Sera were heat-inactivated and all samples run in triplicate in 96-well plates. Sera were four-fold  
77 serially diluted in media starting at a 1:100 dilution. Pseudoviruses were added and the virus-  
78 sample mixture was incubated at 37 °C for 1 hour. Control wells only containing virus were  
79 included on all plates. Vero-E6 cells were then added at a density of 4×10<sup>4</sup> cells per well and  
80 plates were incubated at 37 °C with 5% CO<sub>2</sub> for 10 hours. Cells were then lysed and luciferase  
81 activity was measured using the Luciferase Assay System (Promega) and SoftMax Pro v.7.0.2  
82 (Molecular Devices) according to instructions from both manufacturers.

83

### 84 *Quantification and statistical analysis*

85

86 The inhibitory dilution retaining 50% neutralization (ID<sub>50</sub>) was obtained for each serum-virus  
87 combination using a five-parameter dose-response curve in GraphPad Prism v.9.2. Statistical  
88 significance between unpaired groups was evaluated using the two-tailed Mann-Whitney test in  
89 GraphPad Prism v.9.2. Levels of significance are denoted as follows: \**p* < 0.05; \*\**p* < 0.01; and  
90 \*\*\**p* < 0.001.

91

### 92 **Acknowledgements**

93

94 This study was supported by funding from the NIH SARS-CoV-2 Assessment of Viral Evolution  
95 (SAVE) Program as well as the NIH, NIAID contract number 75N93019C00051 (to A.G.). We  
96 thank David Manthei, Emily Stoneman, Victoria Blanc, Pamela Bennett-Baker, Savanna  
97 Sneeringer, Lauren Warsinske, Theresa Kowalski-Dobson, Alyssa Meyers, Zijin Chu, Hailey  
98 Kuiken, Lonnie Barnes, Ashley Eckard, Kathleen Lindsey, Dawson Davis, Aaron Rico, Casey  
99 Juntilla, Daniel Raymond, Mayurika Patel, and Nivea Vydiswaran from the IASO study team for  
100 providing serum samples.

101

### 102 **Author Contributions**

103

104 L.L. and D.D.H. conceived the study. Q.W. and L.L. performed experiments and analyzed data.  
105 Q.W. managed the project. A.B., R.V., C.G. and A.G. collected serum samples. Q.W., A.B.,  
106 L.L., and D.D.H. analyzed the results and wrote the manuscript. L.L. and D.D.H. directed and  
107 supervised the project. All authors reviewed and approved of the manuscript.

108

### 109 **Declaration of Interests**

110

111 D.D.H. is a co-founder of TaiMed Biologics and RenBio, consultant to WuXi Biologics and Bria  
112 Biosciences, and board director for Vicarious Surgical. Aubree Gordon serves on a scientific  
113 advisory board for Janssen Pharmaceuticals. Other authors declare no competing interests.

114

115 **Table S1. Summary of clinical cohorts**  
 116

| <b>Characteristic</b>                                   | <b>3 shots WT<br/>(N=14)</b> | <b>BA.4/BA.5<br/>breakthrough<br/>(N=20)</b> | <b>4 shots<br/>WT<br/>(N=19)</b> | <b>3 shots WT +<br/>bivalent<br/>(N=21)</b> |
|---------------------------------------------------------|------------------------------|----------------------------------------------|----------------------------------|---------------------------------------------|
| Sex — no. (%)                                           |                              |                                              |                                  |                                             |
| Female                                                  | 6 (42.9%)                    | 17 (85.0%)                                   | 17 (89.5%)                       | 16 (76.2%)                                  |
| Male                                                    | 8 (57.1%)                    | 3 (15.0%)                                    | 2 (10.5%)                        | 5 (23.8%)                                   |
| Mean Age (range) — years                                | 52.1 (26, 71)                | 45.5 (24, 71)                                | 55.3 (48, 63)                    | 36.4 (23, 49)                               |
| Mean days post vaccination or infection (range)         | 39.2 (14, 90)                | 31.8 (15, 75)                                | 24.0 (20, 36)                    | 26.4 (23, 30)                               |
| Mean days between vaccines 2 and 3 (range)              | 215.3<br>(117, 344)          | 268.3<br>(200, 330)                          | 267.4<br>(191, 337)              | 242.9<br>(192, 345)                         |
| Mean days between vaccines 3 and 4 (range)              | -                            | 209.3<br>(169, 264)                          | 190.6<br>(122, 294)              | 297.2<br>(224, 346)                         |
| First and Second Vaccine Type — no. (%)                 |                              |                                              |                                  |                                             |
| Pfizer (BNT162b2)                                       | 12 (85.7%)                   | 17 (85.0%)                                   | 18 (94.7%)                       | 17 (81.0%)                                  |
| Moderna (mRNA-1273)                                     | 2 (14.3%)                    | 3 (15.0%)                                    | 1 (5.3%)                         | 4 (19.0%)                                   |
| Third Vaccine Type — no. (%)                            |                              |                                              |                                  |                                             |
| Pfizer (BNT162b2)                                       | 11 (78.6%)                   | 15 (75.0%)                                   | 18 (94.7%)                       | 13 (61.9%)                                  |
| Moderna (mRNA-1273)                                     | 3 (21.4%)                    | 5 (25.0%)                                    | 1 (5.3%)                         | 8 (38.1%)                                   |
| Fourth Vaccine Type (monovalent or *bivalent) — no. (%) |                              |                                              |                                  |                                             |
| Pfizer                                                  | -                            | 4 (20.0%)                                    | 18 (94.7%)                       | *9 (42.9%)                                  |
| Moderna                                                 | -                            | 0 (0.0%)                                     | 1 (5.3%)                         | *12 (57.1%)                                 |

117 **\*Bivalent vaccine formulation. Fields marked “-” are not applicable.**

Table S2. Demographics of clinical cohorts

| Sample ID                     | Vaccine type and infected strain         | Days V2-V3 | Days V3-V4 | Days post-vaccination or *infection | Collection period | Documented COVID-19 | Age | Gender |
|-------------------------------|------------------------------------------|------------|------------|-------------------------------------|-------------------|---------------------|-----|--------|
|                               |                                          |            |            |                                     |                   |                     |     |        |
| <i>3 shots WT</i>             |                                          |            |            |                                     |                   |                     |     |        |
| Q1                            | mRNA-1273/mRNA-1273/mRNA-1273            | 204        | -          | 29                                  | Sep 2021          | No                  | 66  | Female |
| Q2                            | BNT162b2/BNT162b2/BNT162b2               | 197        | -          | 30                                  | Sep 2021          | No                  | 68  | Male   |
| Q3                            | BNT162b2/BNT162b2/BNT162b2               | 227        | -          | 14                                  | Sep 2021          | No                  | 64  | Female |
| Q4                            | BNT162b2/BNT162b2/BNT162b2               | 268        | -          | 34                                  | Nov 2021          | No                  | 55  | Male   |
| Q5                            | BNT162b2/BNT162b2/BNT162b2               | 269        | -          | 34                                  | Nov 2021          | No                  | 45  | Male   |
| Q6                            | BNT162b2/BNT162b2/BNT162b2               | 189        | -          | 15                                  | Nov 2021          | No                  | 50  | Female |
| Q7                            | BNT162b2/BNT162b2/BNT162b2               | 189        | -          | 15                                  | Nov 2021          | No                  | 48  | Female |
| Q8                            | BNT162b2/BNT162b2/BNT162b2               | 256        | -          | 29                                  | Nov 2021          | No                  | 71  | Male   |
| Q9                            | BNT162b2/BNT162b2/BNT162b2               | 140        | -          | 90                                  | Nov 2021          | No                  | 59  | Male   |
| Q10                           | BNT162b2/BNT162b2/BNT162b2               | 179        | -          | 33                                  | Nov 2021          | No                  | 45  | Male   |
| Q11                           | BNT162b2/BNT162b2/BNT162b2               | 117        | -          | 87                                  | Nov 2021          | No                  | 66  | Female |
| Q12                           | BNT162b2/BNT162b2/BNT162b2               | 153        | -          | 84                                  | Nov 2021          | No                  | 26  | Male   |
| Q13                           | mRNA-1273/mRNA-1273/mRNA-1273            | 282        | -          | 23                                  | Nov 2021          | No                  | 28  | Female |
| Q15                           | BNT162b2/BNT162b2/mRNA-1273              | 344        | -          | 32                                  | Feb 2022          | No                  | 39  | Male   |
| <i>BA.4/BA.5 breakthrough</i> |                                          |            |            |                                     |                   |                     |     |        |
| Q71                           | mRNA-1273/mRNA-1273/BNT162b2/BA.5.2.1    | na         | -          | *29                                 | Aug 2022          | Yes                 | 29  | Female |
| Q77                           | BNT162b2/BNT162b2/BNT162b2/BA.5          | 200        | -          | *22                                 | Aug 2022          | Yes                 | 61  | Female |
| Q79                           | mRNA-1273/mRNA-1273/mRNA-1273/BA.5       | 264        | -          | *15                                 | Aug 2022          | Yes                 | 28  | Female |
| Q80                           | mRNA-1273/mRNA-1273/mRNA-1273/BA.5       | 269        | -          | *21                                 | Aug 2022          | Yes                 | 24  | Female |
| Q81                           | BNT162b2/BNT162b2/BNT162b2/BA.5          | 266        | -          | *75                                 | Sep 2022          | Yes                 | 35  | Female |
| Q82                           | BNT162b2/BNT162b2/mRNA-1273/BA.5         | 269        | -          | *63                                 | Sep 2022          | Yes                 | 46  | Female |
| Q83                           | BNT162b2/BNT162b2/BNT162b2/BA.5          | 268        | -          | *28                                 | Sep 2022          | Yes                 | 55  | Male   |
| Q84                           | BNT162b2/BNT162b2/BNT162b2/BA.5          | 301        | -          | *17                                 | Sep 2022          | Yes                 | 57  | Female |
| UM-85                         | BNT162b2/BNT162b2/BNT162b2/BA.5          | 330        | -          | *29                                 | Aug 2022          | Yes                 | 46  | Female |
| UM-86                         | BNT162b2/BNT162b2/mRNA-1273/BA.5         | 323        | -          | *28                                 | Aug 2022          | Yes                 | 38  | Female |
| UM-87                         | BNT162b2/BNT162b2/BNT162b2/BNT162b2/BA.5 | 271        | 169        | *29                                 | Aug 2022          | Yes                 | 56  | Female |
| UM-88                         | BNT162b2/BNT162b2/BNT162b2/BNT162b2/BA.5 | 208        | 232        | *33                                 | Sep 2022          | Yes                 | 71  | Male   |
| UM-89                         | BNT162b2/BNT162b2/BNT162b2/BA.5          | 277        | -          | *28                                 | Sep 2022          | Yes                 | 46  | Male   |
| UM-90                         | BNT162b2/BNT162b2/BNT162b2/BNT162b2/BA.5 | 254        | 264        | *42                                 | Aug 2022          | Yes                 | 43  | Female |
| UM-91                         | BNT162b2/BNT162b2/BNT162b2/BA.5          | 213        | -          | *29                                 | Aug 2022          | Yes                 | 46  | Female |
| UM-92                         | BNT162b2/BNT162b2/BNT162b2/BA.5          | 280        | -          | *31                                 | Aug 2022          | Yes                 | 31  | Female |
| UM-93                         | BNT162b2/BNT162b2/BNT162b2/BA.5          | 232        | -          | *31                                 | Aug 2022          | Yes                 | 50  | Female |
| UM-94                         | BNT162b2/BNT162b2/BNT162b2/BNT162b2/BA.5 | 329        | 172        | *28                                 | Aug 2022          | Yes                 | 50  | Female |
| UM-95                         | BNT162b2/BNT162b2/mRNA-1273/BA.5         | 234        | -          | *29                                 | Aug 2022          | Yes                 | 38  | Female |
| UM-96                         | BNT162b2/BNT162b2/BNT162b2/BA.5          | 310        | -          | *28                                 | Aug 2022          | Yes                 | 60  | Female |
| <i>4 shots WT</i>             |                                          |            |            |                                     |                   |                     |     |        |
| UM-65                         | BNT162b2/BNT162b2/BNT162b2/BNT162b2      | 260        | 181        | 24                                  | May 2022          | No                  | 52  | Female |
| UM-66                         | BNT162b2/BNT162b2/BNT162b2/BNT162b2      | 239        | 224        | 20                                  | May 2022          | No                  | 57  | Female |
| UM-67                         | BNT162b2/BNT162b2/BNT162b2/BNT162b2      | 271        | 177        | 20                                  | May 2022          | No                  | 61  | Female |
| UM-68                         | mRNA-1273/mRNA-1273/mRNA-1273/mRNA-1273  | 191        | 176        | 22                                  | May 2022          | No                  | 48  | Female |
| UM-69                         | BNT162b2/BNT162b2/BNT162b2/BNT162b2      | 337        | 122        | 23                                  | May 2022          | No                  | 50  | Female |
| UM-70                         | BNT162b2/BNT162b2/BNT162b2/BNT162b2      | 260        | 193        | 22                                  | May 2022          | No                  | 50  | Female |
| UM-71                         | BNT162b2/BNT162b2/BNT162b2/BNT162b2      | 290        | 182        | 20                                  | May 2022          | No                  | 58  | Female |
| UM-72                         | BNT162b2/BNT162b2/BNT162b2/BNT162b2      | 295        | 162        | 26                                  | May 2022          | No                  | 56  | Female |
| UM-73                         | BNT162b2/BNT162b2/BNT162b2/BNT162b2      | 228        | 132        | 29                                  | May 2022          | No                  | 63  | Female |
| UM-74                         | BNT162b2/BNT162b2/BNT162b2/BNT162b2      | 288        | 178        | 25                                  | Jun 2022          | No                  | 58  | Female |
| UM-75                         | BNT162b2/BNT162b2/BNT162b2/BNT162b2      | 279        | 204        | 21                                  | Jun 2022          | No                  | 62  | Male   |
| UM-76                         | BNT162b2/BNT162b2/BNT162b2/BNT162b2      | 201        | 199        | 26                                  | Jun 2022          | No                  | 54  | Female |
| UM-77                         | BNT162b2/BNT162b2/BNT162b2/BNT162b2      | 244        | 228        | 23                                  | Jun 2022          | No                  | 53  | Male   |
| UM-78                         | BNT162b2/BNT162b2/BNT162b2/BNT162b2      | 323        | 156        | 21                                  | Jun 2022          | No                  | 55  | Female |
| UM-79                         | BNT162b2/BNT162b2/BNT162b2/BNT162b2      | 313        | 151        | 23                                  | Jun 2022          | No                  | 59  | Female |
| UM-80                         | BNT162b2/BNT162b2/BNT162b2/BNT162b2      | 252        | 241        | 21                                  | Jun 2022          | No                  | 49  | Female |
| UM-81                         | BNT162b2/BNT162b2/BNT162b2/BNT162b2      | 310        | 247        | 27                                  | Sep 2022          | No                  | 57  | Female |
| UM-82                         | BNT162b2/BNT162b2/BNT162b2/BNT162b2      | 284        | 294        | 27                                  | Sep 2022          | No                  | 55  | Female |
| Q97                           | BNT162b2/BNT162b2/BNT162b2/BNT162b2      | 216        | 175        | 36                                  | Jun 2022          | No                  | 53  | Female |
| <i>3 shots WT + bivalent</i>  |                                          |            |            |                                     |                   |                     |     |        |

| Sample ID | Vaccine type and infected strain                | Days V2-V3 | Days V3-V4 | Days post-                | Collection period | Documented COVID-19 | Age | Gender |
|-----------|-------------------------------------------------|------------|------------|---------------------------|-------------------|---------------------|-----|--------|
|           |                                                 |            |            | vaccination or *infection |                   |                     |     |        |
| UM-36     | BNT162b2/BNT162b2/BNT162b2/Moderna Bivalent     | 259        | 327        | 24                        | Sep 2022          | No                  | 38  | Female |
| UM-37     | BNT162b2/BNT162b2/BNT162b2/Moderna Bivalent     | 218        | 281        | 27                        | Oct 2022          | No                  | 42  | Female |
| UM-39     | mRNA-1273//mRNA-1273/mRNA-1273/Moderna Bivalent | 205        | 294        | 24                        | Oct 2022          | No                  | 36  | Male   |
| UM-40     | BNT162b2/BNT162b2/BNT162b2/Pfizer Bivalent      | 253        | 336        | 25                        | Oct 2022          | No                  | 37  | Female |
| UM-41     | BNT162b2/BNT162b2/BNT162b2/Pfizer Bivalent      | 225        | 280        | 24                        | Oct 2022          | No                  | 36  | Male   |
| UM-43     | BNT162b2/BNT162b2/BNT162b2/Pfizer Bivalent      | 275        | 330        | 25                        | Oct 2022          | No                  | 49  | Female |
| UM-44     | BNT162b2/BNT162b2/BNT162b2/Moderna Bivalent     | 213        | 280        | 25                        | Oct 2022          | No                  | 37  | Female |
| UM-47     | BNT162b2/BNT162b2/BNT162b2/Pfizer Bivalent      | 256        | 346        | 26                        | Oct 2022          | No                  | 45  | Male   |
| UM-48     | BNT162b2/BNT162b2/mRNA-1273/Moderna Bivalent    | 223        | 288        | 26                        | Oct 2022          | No                  | 43  | Female |
| UM-51     | mRNA-1273/mRNA-1273/mRNA-1273/Moderna Bivalent  | 211        | 279        | 29                        | Oct 2022          | No                  | 32  | Female |
| UM-52     | BNT162b2/BNT162b2/BNT162b2/Pfizer Bivalent      | 226        | 290        | 23                        | Oct 2022          | No                  | 43  | Female |
| UM-53     | BNT162b2/BNT162b2/BNT162b2/Pfizer Bivalent      | 247        | 341        | 26                        | Oct 2022          | No                  | 43  | Female |
| UM-54     | BNT162b2/BNT162b2/mRNA-1273/Moderna Bivalent    | 250        | 316        | 29                        | Oct 2022          | No                  | 38  | Female |
| UM-55     | BNT162b2/BNT162b2/BNT162b2/Moderna Bivalent     | 203        | 298        | 28                        | Oct 2022          | No                  | 38  | Female |
| UM-56     | BNT162b2/BNT162b2/mRNA-1273/Moderna Bivalent    | 266        | 321        | 27                        | Oct 2022          | No                  | 36  | Female |
| UM-60     | BNT162b2/BNT162b2/BNT162b2/Moderna Bivalent     | 254        | 346        | 30                        | Oct 2022          | No                  | 24  | Female |
| Q101      | mRNA-1273/mRNA-1273/mRNA-1273/Moderna Bivalent  | 314        | 274        | 30                        | Oct 2022          | No                  | 32  | Female |
| Q102      | BNT162b2/BNT162b2/mRNA-1273/Moderna Bivalent    | 345        | 254        | 23                        | Oct 2022          | No                  | 39  | Male   |
| Q103      | BNT162b2/BNT162b2/BNT162b2/Pfizer Bivalent      | 192        | 224        | 30                        | Oct 2022          | No                  | 26  | Female |
| Q104      | mRNA-1273/mRNA-1273/mRNA-1273/Pfizer Bivalent   | 217        | 269        | 30                        | Oct 2022          | No                  | 27  | Female |
| Q105      | BNT162b2/BNT162b2/BNT162b2/Pfizer Bivalent      | 248        | 268        | 23                        | Oct 2022          | No                  | 23  | Male   |

119 \* Days post infection. Fields marked “-” are not applicable. Fields marked “na” represent missing data. V2-V3  
120 indicates days between vaccine doses two and three. V3-V4 indicates days between vaccine doses three and four.



121 **Supplementary References**

122

123 1. Simon V, Kota V, Bloomquist RF, et al. PARIS and SPARTA: Finding the Achilles' Heel  
124 of SARS-CoV-2. *mSphere* 2022;7:e0017922.

125 2. Wang Q, Guo Y, Iketani S, et al. Antibody evasion by SARS-CoV-2 Omicron  
126 subvariants BA.2.12.1, BA.4 and BA.5. *Nature* 2022;608:603-8.

127 3. Liu L, Iketani S, Guo Y, et al. Striking antibody evasion manifested by the Omicron  
128 variant of SARS-CoV-2. *Nature* 2022;602:676-81.

129 4. Iketani S, Liu L, Guo Y, et al. Antibody evasion properties of SARS-CoV-2 Omicron  
130 sublineages. *Nature* 2022;604:553-6.

131 5. Wang Q, Iketani S, Li Z, et al. Antigenic characterization of the SARS-CoV-2 Omicron  
132 subvariant BA.2.75. *Cell Host Microbe* 2022.

133 6. Wang Q, Li Z, Ho J, et al. Resistance of SARS-CoV-2 Omicron Subvariant BA.4.6 to  
134 Antibody Neutralization. *bioRxiv* 2022:2022.09.05.506628.

135 7. Liu L, Iketani S, Guo Y, et al. An antibody class with a common CDRH3 motif broadly  
136 neutralizes sarbecoviruses. *Sci Transl Med* 2022;14:eabn6859.

137 8. Liu L, Wang P, Nair MS, et al. Potent neutralizing antibodies against multiple epitopes  
138 on SARS-CoV-2 spike. *Nature* 2020;584:450-6.

139
