# Supplementary material
Source: PubMed Central journal article supplement (PMC9847504)
Supplement: NEJMc2213907_disclosures.pdf [file NEJMc2213907_disclosures.pdf]

Anthony Bowen

**Discloser Identifier:** 1055384

**Disclosure Purpose:** 22-13907

## Summary of Interests

I do not have any interests to disclose at this time.

## Additional Questions

1. **Are there other relationships or activities that readers could perceive to have influenced, or that give the appearance of potentially influencing, what you wrote in the submitted work?**

No.

2. **What is the manuscript title?**

Antibody responses to Omicron BA.4/BA.5 bivalent mRNA vaccine booster shot

3. **Are you the corresponding author?**

No.

## Certification

I certify that the information provided in this disclosure is complete and accurate.

Discloser Identifier: 1100619

Disclosure Purpose: 22-13907

## Summary of Interests

### Company or Organization

| Entity                                                                                                                                                                                                                                                                                                                                                                          | Type             | Interest Held By |
|---------------------------------------------------------------------------------------------------------------------------------------------------------------------------------------------------------------------------------------------------------------------------------------------------------------------------------------------------------------------------------|------------------|------------------|
| Access Bio, Inc                                                                                                                                                                                                                                                                                                                                                                 | Grant / Contract | Self             |
| <i>Recipient Name:</i> James Baldwin<br><i>Grant / Contract Description:</i> Validating a rapid point-of-care COVID-19 antibody test and assessing its utility<br><i>Additional Information:</i> % Effort, time commitment for evaluating the performance of a POC COVID-19 antibody test.<br><i>Recipient Type:</i> Institution<br><i>Grant / Contract Purpose:</i> Research   |                  |                  |
| Division of Intramural Research, National Institute of Allergy and Infectious Diseases                                                                                                                                                                                                                                                                                          | Grant / Contract | Self             |
| <i>Recipient Name:</i> Aubree Gordon<br><i>Grant / Contract Description:</i><br><i>Additional Information:</i> time commitment<br><i>Recipient Type:</i> Institution<br><i>Grant / Contract Purpose:</i> Research                                                                                                                                                               |                  |                  |
| Healgen Scientific LLC                                                                                                                                                                                                                                                                                                                                                          | Grant / Contract | Self             |
| <i>Recipient Name:</i> Charles Schuler<br><i>Grant / Contract Description:</i> Validating a rapid point-of-care COVID-19 antibody test and assessing its utility<br><i>Additional Information:</i> % Effort, time commitment for evaluating the performance of a POC COVID-19 antibody test.<br><i>Recipient Type:</i> Institution<br><i>Grant / Contract Purpose:</i> Research |                  |                  |

## Additional Questions

1. **Are there other relationships or activities that readers could perceive to have influenced, or that give the appearance of potentially influencing, what you wrote in the submitted work?**

No.

2. **What is the manuscript title?**

Antibody Responses to Omicron BA.4/BA.5 Bivalent mRNA Vaccine Booster Shot

3. **Are you the corresponding author?**

No.

## Certification

I certify that the information provided in this disclosure is complete and accurate.



Aubree Gordon

Discloser Identifier: 800762

Disclosure Purpose: 22-13907

## Summary of Interests

### Company or Organization

| Entity                                                                                                                                    | Type             | Interest Held By |
|-------------------------------------------------------------------------------------------------------------------------------------------|------------------|------------------|
| Janssen Biotech, Inc.                                                                                                                     | Other            | Self             |
| <i>Category:</i> Other<br><i>Description:</i> Scientific Advisory Board<br><i>Additional Information:</i>                                 |                  |                  |
| National Institutes of Health                                                                                                             | Grant / Contract | Self             |
| <i>Recipient Name:</i> Aubree Gordon<br><i>Grant / Contract Description:</i> NIAID contracts and grants<br><i>Additional Information:</i> |                  |                  |
| <i>Recipient Type:</i> Institution<br><i>Grant / Contract Purpose:</i> Research                                                           |                  |                  |

## Additional Questions

1. **Are there other relationships or activities that readers could perceive to have influenced, or that give the appearance of potentially influencing, what you wrote in the submitted work?**

No.

2. **What is the manuscript title?**

Antibody Responses to Omicron BA.4/BA.5 Bivalent mRNA Vaccine Booster Shot

3. **Are you the corresponding author?**

No.

## Certification

I certify that the information provided in this disclosure is complete and accurate.

Discloser Identifier: 923729

Disclosure Purpose: 22-13907

## Summary of Interests

### Company or Organization

| Entity                                                                                                            | Type       | Interest Held By |
|-------------------------------------------------------------------------------------------------------------------|------------|------------------|
| Brii 111 Biosciences                                                                                              | Consultant | Self             |
| <i>Category:</i> Consultant<br><i>Description:</i> SAB<br><i>Additional Information:</i> stock options            |            |                  |
| RenBio                                                                                                            | Other      | Self             |
| <i>Category:</i> Other<br><i>Description:</i> co-founder<br><i>Additional Information:</i> stock options          |            |                  |
| TaiMed Biologics                                                                                                  | Other      | Self             |
| <i>Category:</i> Other<br><i>Description:</i> co-founder<br><i>Additional Information:</i> stocks                 |            |                  |
| Vicarious Surgical                                                                                                | Other      | Self             |
| <i>Category:</i> Other<br><i>Description:</i> board director<br><i>Additional Information:</i> stock options      |            |                  |
| WuXi Biologics                                                                                                    | Consultant | Self             |
| <i>Category:</i> Consultant<br><i>Description:</i> SAB<br><i>Additional Information:</i> Annual cash compensation |            |                  |

## Additional Questions

1. Are there other relationships or activities that readers could perceive to have influenced, or that give the appearance of potentially influencing, what you wrote in the submitted work?

No.

2. What is the manuscript title?

Antibody Responses to Omicron BA.4/BA.5 Bivalent mRNA Vaccine Booster Shot

3. Are you the corresponding author?

Yes.

a. Please list the other authors' names here.

Qian Wang, Anthony Bowen, Riccardo Valdez, Carmen Gherasim, Aubree Gordon, Lihong Liu.

## Certification

I certify that the information provided in this disclosure is complete and accurate.

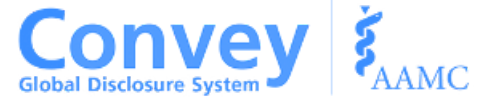

**Discloser Identifier:** 925983

**Disclosure Purpose:** 22-13907

## Summary of Interests

I do not have any interests to disclose at this time.

## Additional Questions

1. **Are there other relationships or activities that readers could perceive to have influenced, or that give the appearance of potentially influencing, what you wrote in the submitted work?**

No.

2. **What is the manuscript title?**

Antibody Responses to Omicron BA.4/BA.5 Bivalent mRNA Vaccine Booster Shot

3. **Are you the corresponding author?**

No.

## Certification

I certify that the information provided in this disclosure is complete and accurate.

Riccardo Valdez

**Discloser Identifier:** 1100618

**Disclosure Purpose:** 22-13907

## Summary of Interests

I do not have any interests to disclose at this time.

## Additional Questions

1. **Are there other relationships or activities that readers could perceive to have influenced, or that give the appearance of potentially influencing, what you wrote in the submitted work?**

No.

2. **What is the manuscript title?**

Antibody Responses to Omicron BA.4/BA.5 Bivalent mRNA Vaccine Booster Shot

3. **Are you the corresponding author?**

No.

## Certification

I certify that the information provided in this disclosure is complete and accurate.



Qian Wang

**Discloser Identifier:** 1094693

**Disclosure Purpose:** 22-13907

## Summary of Interests

I do not have any interests to disclose at this time.

## Additional Questions

1. **Are there other relationships or activities that readers could perceive to have influenced, or that give the appearance of potentially influencing, what you wrote in the submitted work?**

No.

2. **What is the manuscript title?**

Antibody Responses to Omicron BA.4/BA.5 Bivalent mRNA Vaccine Booster Shot

3. **Are you the corresponding author?**

No.

## Certification

I certify that the information provided in this disclosure is complete and accurate.
